# Supplementary material for: Culture-Independent Survey of Thermophilic Microbial Communities of the North Caucasus
Source: MDPI journal article supplement (doi:10.3390/biology10121352), 2021-12-20

## SUPPLEMENTARY MATERIALS

# First culture-independent survey of thermophilic microbial communities of North Caucasus.

Toshchakov SV<sup>1,\*</sup>, Izotova AO<sup>1</sup>, Vinogradova EN<sup>1</sup>, Kachmazov GS<sup>2</sup>, Tuaeva AY<sup>3</sup>, Abaev VT<sup>2</sup>, Evteeva MA<sup>1</sup>, Gunitseva NM<sup>1</sup>, Korzhenkov AA<sup>1</sup>, Elcheninov AG<sup>4</sup>, Patrushev MV<sup>1</sup>, Kublanov IV<sup>4</sup>

<sup>1</sup> Kurchatov Center for Genome Research, National Research Center “Kurchatov Institute”, Ac. Kurchatov square, 1, 123098 Moscow, Russia; nrcki@nrcki.ru

<sup>2</sup> North Ossetian State University named after K.L. Khetagurov, Vatutina str., 44-46, 362025, Vladikavkaz, Republic North Ossetia-Alania, Russia; nosu@nosu.ru

<sup>3</sup> Winogradsky Institute of Microbiology, Research Center of Biotechnology RAS, 60-let Oktyazbrya Av., 7/2, 119071, Moscow, Russia; inmi@inmi.ru

<sup>4</sup> National Research Center Kurchatov Institute-GOSNIIGENETIKA, 1st Dorozhny Pr., 1, 117545, Moscow, Russia; vkpm@genetika.ru

\* Correspondence: stepan.toshchakov@gmail.com; Tel.: +7-911-481-1809

## SUPPLEMENTARY TABLES

Supplementary Table S1. Tracking of read number of V4 16S rRNA dataset, processed with DADA2 pipeline

| Sample.names                     | input  | filtered | denoisedF | denoisedR | merged | nonchim |
|----------------------------------|--------|----------|-----------|-----------|--------|---------|
| alania.4128.filter.0.22.V4.repl1 | 14774  | 14305    | 14056     | 14175     | 13555  | 13530   |
| alania.4128.filter.0.22.V4.repl2 | 17167  | 16541    | 16338     | 16390     | 15745  | 15725   |
| alania.4128.filter.0.45.V4.repl1 | 28240  | 27700    | 27384     | 27474     | 25649  | 23974   |
| alania.4128.filter.0.45.V4.repl2 | 26680  | 26032    | 25745     | 25853     | 24062  | 22262   |
| alania.4128.tube.V4.repl1        | 26652  | 26128    | 25712     | 25860     | 24196  | 24096   |
| alania.4128.tube.V4.repl2        | 27907  | 27369    | 26936     | 27064     | 25195  | 24954   |
| alania.4129A.tube.V4.repl1       | 16767  | 16337    | 16214     | 16241     | 15955  | 15940   |
| alania.4129A.tube.V4.repl2       | 17134  | 16691    | 16538     | 16583     | 16281  | 16253   |
| alania.4135.filter.0.22.V4.repl1 | 15369  | 14959    | 14101     | 14440     | 12461  | 12391   |
| alania.4135.filter.0.22.V4.repl2 | 15075  | 14746    | 14031     | 14232     | 12673  | 12599   |
| alania.4135.filter.0.45.V4.repl1 | 23244  | 22608    | 21280     | 21976     | 18951  | 18877   |
| alania.4135.filter.0.45.V4.repl2 | 18791  | 18342    | 17200     | 17650     | 15260  | 15201   |
| alania.4135.tube.V4.repl1        | 22057  | 21669    | 21304     | 21435     | 19103  | 17968   |
| alania.4135.tube.V4.repl2        | 31948  | 31236    | 30676     | 30937     | 27913  | 26029   |
| alania.4138.filter.0.22.V4.repl1 | 13102  | 12823    | 12540     | 12608     | 12055  | 11975   |
| alania.4138.filter.0.22.V4.repl2 | 16136  | 15773    | 15425     | 15587     | 14749  | 14728   |
| alania.4138.filter.0.45.V4.repl1 | 21931  | 21593    | 21262     | 21384     | 20410  | 20088   |
| alania.4138.filter.0.45.V4.repl2 | 25034  | 24702    | 24407     | 24493     | 23361  | 22891   |
| alania.4139.tube.V4.repl1        | 23777  | 23287    | 23040     | 23079     | 21911  | 21412   |
| alania.4139.tube.V4.repl2        | 31222  | 30727    | 30468     | 30529     | 29309  | 28320   |
| alania.4146.filter.0.22.V4.repl1 | 26043  | 25230    | 24328     | 24691     | 22273  | 20538   |
| alania.4146.filter.0.22.V4.repl2 | 25345  | 24703    | 23794     | 24175     | 21819  | 19897   |
| alania.4146.filter.0.45.V4.repl1 | 23983  | 23557    | 22279     | 22940     | 19851  | 17321   |
| alania.4146.filter.0.45.V4.repl2 | 15418  | 15001    | 13988     | 14500     | 12572  | 11371   |
| alania.4148.tube.V4.repl1        | 20186  | 19857    | 18447     | 19136     | 14617  | 14454   |
| alania.4148.tube.V4.repl2        | 18646  | 18267    | 16846     | 17654     | 13409  | 13316   |
| Total                            | 562628 | 550183   | 534339    | 541086    | 493335 | 476110  |

**Supplementary Table S2. Alpha diversity metrics of analyzed communities**

| <b>Sample ID</b>               | <b>observed</b> | <b>chao1</b> | <b>diversity<br/>shannon</b> | <b>evenness<br/>pielou</b> | <b>evenness<br/>simpson</b> | <b>dominance<br/>simpson</b> |
|--------------------------------|-----------------|--------------|------------------------------|----------------------------|-----------------------------|------------------------------|
| <b>alania.4128.filter.0.22</b> | 90              | 90           | 2.94                         | 0.65                       | 0.11                        | 0.1                          |
| <b>alania.4128.filter.0.45</b> | 76              | 76           | 2.47                         | 0.57                       | 0.07                        | 0.19                         |
| <b>alania.4128.tube</b>        | 185             | 185.9        | 3.85                         | 0.74                       | 0.13                        | 0.04                         |
| <b>alania.4129A.tube</b>       | 64              | 64           | 2.61                         | 0.63                       | 0.13                        | 0.12                         |
| <b>alania.4135.filter.0.22</b> | 269             | 277          | 4.03                         | 0.72                       | 0.09                        | 0.04                         |
| <b>alania.4135.filter.0.45</b> | 233             | 245.25       | 3.41                         | 0.63                       | 0.05                        | 0.09                         |
| <b>alania.4135.tube</b>        | 159             | 161.67       | 3.59                         | 0.71                       | 0.12                        | 0.05                         |
| <b>alania.4138.filter.0.22</b> | 143             | 151          | 3.01                         | 0.61                       | 0.05                        | 0.13                         |
| <b>alania.4138.filter.0.45</b> | 103             | 105          | 2.9                          | 0.63                       | 0.09                        | 0.11                         |
| <b>alania.4138.tube</b>        | 82              | 83.13        | 2.79                         | 0.63                       | 0.12                        | 0.11                         |
| <b>alania.4146.filter.0.22</b> | 198             | 216          | 3.54                         | 0.67                       | 0.08                        | 0.07                         |
| <b>alania.4146.filter.0.45</b> | 132             | 135.6        | 2.11                         | 0.43                       | 0.03                        | 0.28                         |
| <b>alania.4148.tube</b>        | 322             | 322.64       | 4.56                         | 0.79                       | 0.1                         | 0.03                         |

**Supplementary Table S3. Results of BLAST search of sequences, similar to ASV0001 in publicly available 16S and metagenomic databases**

| Database                                       | Scientific Name                                                             | Query Cover | E value   | Per. ident | Accession          | Isolation source                                                           |
|------------------------------------------------|-----------------------------------------------------------------------------|-------------|-----------|------------|--------------------|----------------------------------------------------------------------------|
| NCBI 16S rRNA sequences (Bacteria and Archaea) | Thermanaeromonas burensis                                                   | 99%         | 1.00E-80  | 88.19      | NR_147776.1        | subterranean Callovo-Oxfordian clay formation, France                      |
|                                                | Moorella humiferrea                                                         | 99%         | 2.00E-78  | 87.7       | NR_108634.1        | terrestrial hydrothermal spring, Kamchatka, Russia                         |
|                                                | Thermanaeromonas toyohensis ToBE                                            | 99%         | 2.00E-78  | 87.6       | NR_024777.1        | geothermal aquifer in the Toyoha Mines, Japan                              |
|                                                | Carboxydothemus hydrogenoformans                                            | 99%         | 6.00E-78  | 87.75      | NR_074395.1        | hot swamp of Kunashir Island, Russia                                       |
|                                                | Carboxydothemus siderophilus                                                | 99%         | 6.00E-78  | 87.75      | NR_044272.1        | terrestrial hydrothermal spring, Kamchatka, Russia                         |
| NCBI nucleotide collection (nr/nt)             | Uncultured bacterium clone OTU48348_AL201_7080163 16S ribosomal RNA gene    | 100%        | 2.00E-110 | 96.02      | KP930849.1         | soil or post-volcanic pyroclastic surface, Alaska, USA                     |
|                                                | Uncultured bacterium clone kab160 16S ribosomal RNA gene                    | 100%        | 9.00E-99  | 93.23      | FJ936877.1         | volcano mud taken at Avachinsky volcano, Kamtchatka, Russia                |
|                                                | Uncultured Firmicutes bacterium clone 7150D1B63 16S ribosomal RNA gene      | 100%        | 9.00E-94  | 92.06      | EF562164.1         | deep-granitic-fracture water from Henderson Molybdenum Mine, Colorado, USA |
|                                                | Uncultured Firmicutes bacterium clone 7150D1B38 16S ribosomal RNA gene      | 100%        | 4.00E-92  | 91.67      | EF562141.1         | deep-granitic-fracture water from Henderson Molybdenum Mine, Colorado, USA |
|                                                | Uncultured bacterium clone BE325FW032701CTS_hole1-20 16S ribosomal RNA gene | 100%        | 4.00E-92  | 91.63      | DQ088766.1         | fracture-derived groundwater in a deep gold mine of South Africa           |
| JGI 16S rRNA public assembled metagenomes      | Dewar_combined assembly                                                     | 100%        | 2.00E-108 | 95         | Ga0212093_12484561 | hot spring sediment from Dewar Creek, British Columbia, Canada             |
|                                                | Hot spring sediment from British Columbia, Canada, Dewar Creek DC16 2012    | 100%        | 2.00E-108 | 95         | Ga0209479_10652191 | hot spring sediment from Dewar Creek, British Columbia, Canada             |
|                                                | Hot spring sediment from British Columbia, Canada, Dewar Creek DC16 2012    | 81%         | 4.00E-84  | 95         | Ga0073933_11454081 | hot spring sediment from Dewar Creek, British Columbia, Canada             |

**Supplementary Table S4. Results of fitting of environmental variables in CCA ordination performed by *envfit* function of *vegan* package**

EIGENVALUES

|           |           |           |           |           |
|-----------|-----------|-----------|-----------|-----------|
| CCA1      | CCA2      | CCA3      | CCA4      | CCA5      |
| 0.9457885 | 0.8326652 | 0.7854286 | 0.6721891 | 0.5573745 |

Permutation: free

Number of permutations: 999

| factor | CCA1   | CCA2   | r <sup>2</sup> | Pr(>r) |
|--------|--------|--------|----------------|--------|
| S      | -0.996 | -0.996 | 0.997          | 0.001  |
| Zr     | -0.992 | -0.992 | 0.996          | 0.002  |
| In     | -0.992 | -0.992 | 0.996          | 0.002  |
| Sn     | -0.992 | -0.992 | 0.996          | 0.002  |
| As     | 0.855  | 0.855  | 0.990          | 0.001  |
| Mg     | -0.981 | -0.981 | 0.988          | 0.001  |
| Zn     | -0.837 | -0.837 | 0.972          | 0.001  |
| T, °C  | 0.592  | 0.592  | 0.965          | 0.001  |
| Be     | 0.359  | 0.359  | 0.955          | 0.001  |
| Ca     | -0.825 | -0.825 | 0.954          | 0.001  |
| Sr     | -0.741 | -0.741 | 0.938          | 0.001  |
| Dy     | 0.372  | 0.372  | 0.930          | 0.001  |
| Ge     | 0.434  | 0.434  | 0.926          | 0.001  |
| B      | 0.309  | 0.309  | 0.924          | 0.001  |
| Si     | 0.391  | 0.391  | 0.922          | 0.001  |
| Br     | -0.534 | -0.534 | 0.916          | 0.001  |
| Sm     | 0.376  | 0.376  | 0.914          | 0.001  |
| Ba     | 0.433  | 0.433  | 0.910          | 0.001  |
| Cs     | 0.378  | 0.378  | 0.903          | 0.001  |
| U      | -0.695 | -0.695 | 0.903          | 0.002  |
| Rb     | 0.358  | 0.358  | 0.901          | 0.001  |
| K      | 0.227  | 0.227  | 0.898          | 0.001  |
| Gd     | 0.381  | 0.381  | 0.898          | 0.001  |
| Li     | 0.312  | 0.312  | 0.897          | 0.001  |
| Na     | -0.267 | -0.267 | 0.896          | 0.001  |
| Mn     | 0.376  | 0.376  | 0.895          | 0.001  |
| Fe     | 0.383  | 0.383  | 0.887          | 0.001  |
| Mo     | 0.528  | 0.528  | 0.886          | 0.003  |
| Al     | 0.502  | 0.502  | 0.502          | 0.003  |
| V      | 0.502  | 0.502  | 0.502          | 0.003  |
| Ga     | 0.502  | 0.502  | 0.502          | 0.003  |
| Cd     | 0.502  | 0.502  | 0.502          | 0.003  |
| Sb     | 0.502  | 0.502  | 0.502          | 0.003  |
| Tl     | 0.502  | 0.502  | 0.502          | 0.003  |
| Th     | 0.502  | 0.502  | 0.502          | 0.003  |
| W      | 0.5    | 0.5    | 0.5            | 0.002  |
| Y      | -0.79  | -0.79  | -0.79          | 0.001  |
| factor | CCA1   | CCA2   | r <sup>2</sup> | Pr(>r) |
| Yb     | 0.39   | 0.39   | 0.854          | 0.001  |

| factor | CCA1   | CCA2   | r <sup>2</sup> | Pr(>r) |
|--------|--------|--------|----------------|--------|
| pH     | 0.078  | 0.078  | 0.845          | 0.001  |
| La     | -0.325 | -0.325 | 0.816          | 0.004  |
| Ho     | 0.401  | 0.401  | 0.794          | 0.002  |
| Er     | 0.401  | 0.401  | 0.792          | 0.003  |
| Ce     | 0.199  | 0.199  | 0.756          | 0.005  |
| Pr     | 0.419  | 0.419  | 0.683          | 0.011  |
| Nd     | 0.145  | 0.145  | 0.583          | 0.033  |
| eH     | -0.967 | -0.967 | 0.500          | 0.035  |
| Pb     | 0.671  | 0.671  | 0.083          | 0.756  |
| Eu     | 0.671  | 0.671  | 0.083          | 0.756  |
| P      | 0      | 0      | 0.008          | 1      |
| Se     | 0      | 0      | 0.008          | 1      |
| Hg.    | 0      | 0      | 0.008          | 1      |
| Nb     | 0      | 0      | 0.008          | 1      |
| Ru     | 0      | 0      | 0.008          | 1      |
| Rh     | 0      | 0      | 0.008          | 1      |
| Pd     | 0      | 0      | 0.008          | 1      |
| Ag     | 0      | 0      | 0.008          | 1      |
| Ir     | 0      | 0      | 0.008          | 1      |
| Pt     | 0      | 0      | 0.008          | 1      |
| Sc     | 0      | 0      | 0              | 1      |
| Ti     | 0      | 0      | 0              | 1      |
| Cr     | 0      | 0      | 0              | 1      |
| Co     | 0      | 0      | 0              | 1      |
| Ni     | 0      | 0      | 0              | 1      |
| Cu     | 0      | 0      | 0              | 1      |
| Te     | 0      | 0      | 0              | 1      |
| Tb     | 0      | 0      | 0              | 1      |
| Tm     | 0      | 0      | 0              | 1      |
| Lu     | 0      | 0      | 0              | 1      |
| Hf     | 0      | 0      | 0              | 1      |
| Ta     | 0      | 0      | 0              | 1      |
| Re     | 0      | 0      | 0              | 1      |
| Os     | 0      | 0      | 0              | 1      |
| Au     | 0      | 0      | 0              | 1      |
| Bi     | 0      | 0      | 0              | 1      |

**Supplementary Table S5. Morphological and metabolic properties of closest cultivated relatives of most abundant taxa**

| ASV      | Genus                                    | Sampling site with maximum abundance | Sample type with maximal abundance | Max. abundance, % | manual NCBI/type material best BLAST hit (BBH) | Morphology (width / length in $\mu\text{m}$ ) of BBH* | T <sub>opt</sub> , °C (min - max) of BBH* | Characteristic metabolic features of BBH*                                                                                                                               | Reference |
|----------|------------------------------------------|--------------------------------------|------------------------------------|-------------------|------------------------------------------------|-------------------------------------------------------|-------------------------------------------|-------------------------------------------------------------------------------------------------------------------------------------------------------------------------|-----------|
| ASV_0002 | Thiofaba                                 | Ursdon                               | 0.45 $\mu\text{m}$ filter          | 72.71             | Thiofaba tepidiphila BDA453 (99.6%)            | rods (0.4 / 0.5-0.9)                                  | 45 (20-51)                                | obligate autotroph; aerobe, oxidizes reduced sulfur compounds                                                                                                           | [37]      |
| ASV_0003 | Unclassified Hydrogenophilaceae (Family) | Biragzang                            | 0.45 $\mu\text{m}$ filter          | 51.27             | Annwoodia aquaesulis DSM 4255 (96.02%)         | rods (0.3 / 0.9)                                      | 43 (30-55)                                | facultatively autotroph (via Calvin cycle); hetetotrophic growth with yeast extract; oxidizes reduced sulfur compounds with oxygen or nitrate as the electron acceptors | [34]      |
| ASV_0004 | Tepidimonas                              | Biragzang                            | microbial mat                      | 26.34             | Tepidimonas taiwanensis LMG 22826 (100%)       | rods (0.4-1 / 0.8-2)                                  | 50-55 (25-65)                             | obligate heterotroph (uses of amino acids, organic acids and some sugars as carbon and energy sources); aerobe; oxidizes reduced sulfur compounds                       | [66]      |
| ASV_0005 | Acinetobacter                            | Karmadon 4138                        | 0.45 $\mu\text{m}$ filter          | 46.03             | Acinetobacter johnsonii ATCC 17909 (99.6%)     | rods (0.9-1.6 / 1.5-2.5)                              | ~33-42 (ND)                               | obligate heterotroph (uses wide range of organic compunds); aerobe; oxidizes organic reducing equivalents via aerobic respiration                                       | [69]      |

**Supplementary Table S5. Morphological and metabolic properties of closest cultivated relatives of most abundant taxa (continued)**

| ASV             | Genus         | Sampling site with maximum abundance | Sample type with maximal abundance | Max. abundance, % | manual NCBI/type material best BLAST hit (BBH) | Morphology (width / length in $\mu\text{m}$ ) of BBH* | T <sub>opt</sub> , °C (min - max) of BBH* | Characteristic metabolic features of BBH*                                                                                                       | Reference |
|-----------------|---------------|--------------------------------------|------------------------------------|-------------------|------------------------------------------------|-------------------------------------------------------|-------------------------------------------|-------------------------------------------------------------------------------------------------------------------------------------------------|-----------|
| <b>ASV_0016</b> | Ahniella      | Biragzang                            | microbial mat                      | 17.76             | Dokdonella fugitiva A3 (94.82%)                | rods (0.4 / 1.7-5.8)                                  | 37-40 (15-50)                             | heterotroph; strict aerobe; utilizes various sugars and amino acids                                                                             | [70]      |
| <b>ASV_0007</b> | Klebsiella    | Karmadon 4138                        | sediment                           | 19.13             | Enterobacteriaceae spp. (100%)                 | rods (0.3-1 / 0.6-6)                                  | ~30-37 (~5-44.5)                          | obligate heterotroph; facultative anaerobe; possess respiratory and fermentative type of metabolism                                             | [71]      |
| <b>ASV_0008</b> | Pseudomonas   | Karmadon 4138                        | sediment                           | 28.95             | Pseudomonas khazarica TBZ2 (100%)              | rods (0.5-1 / 1.5-5)                                  | ~28 (4-45)                                | obligate heterotroph; facultative anaerobe; possess aerobic respiration and nitrate reduction                                                   | [72]      |
| <b>ASV_0010</b> | Tepidicella   | Biragzang                            | 0.22 $\mu\text{m}$ filter          | 27.38             | Tepidicella xavieri TU-16 (100%)               | rods (0.5-1 / 1-2)                                    | 45 (25-55)                                | obligate heterotroph (uses of amino acids and organic acids as carbon source); aerobe; oxidizes reduced sulfur compounds                        | [65]      |
| <b>ASV_0011</b> | Defluviimonas | Karmadon 4135                        | 0.45 $\mu\text{m}$ filter          | 17.89             | Albidovulum inexpectatum FRR-10 (100%)         | rods (0.4-0.6 / 1.4-2.2)                              | 50 (ND-60)                                | obligate heterotroph (uses of amino acids, organic acids, sugars and polyols as carbon and energy sources); aerobe; possess aerobic respiration | [73]      |

**Supplementary Table S5. Morphological and metabolic properties of closest cultivated relatives of most abundant taxa (continued)**

| ASV             | Genus                                    | Sampling site with maximum abundance | Sample type with maximal abundance | Max. abundance, % | manual NCBI/type material best BLAST hit (BBH) | Morphology (width / length in $\mu\text{m}$ ) of BBH* | T <sub>opt</sub> , °C (min - max) of BBH* | Characteristic metabolic features of BBH*                                                                                                                                      | Reference |
|-----------------|------------------------------------------|--------------------------------------|------------------------------------|-------------------|------------------------------------------------|-------------------------------------------------------|-------------------------------------------|--------------------------------------------------------------------------------------------------------------------------------------------------------------------------------|-----------|
| <b>ASV_0012</b> | Thiobacter                               | Karmadon 4138                        | 0.22 $\mu\text{m}$ filter          | 26.57             | Thiobacter subterraneus C55 (100%)             | rods (0.4-0.5 / 1.1-1.9)                              | 50-55 (35-62)                             | obligate autotroph; aerobe, oxidizes reduced sulfur compounds                                                                                                                  | [64]      |
| <b>ASV_0014</b> | Ignavibacterium                          | Karmadon 4138                        | sediment                           | 10.39             | Ignavibacterium album JCM 16511 (99.6%)        | rods (0.2-0.3 / 2-16)                                 | 45 (30-55)                                | facultatively anaerobic heterotroph, capable to utilize various organic substrates                                                                                             | [74]      |
| <b>ASV_0021</b> | Candidatus Alysiosphaera                 | Karmadon 4135                        | 0.45 $\mu\text{m}$ filter          | 5.84              | Arboricoccus pini B29T1 (91.63%)               | diplococci (0.4-0.5 / 0.9-1.2)                        | 26-30 (15-37)                             | obligate heterotroph (utilizes sugars and some organic acids); facultative anaerobe; possess aerobic respiration                                                               | [75]      |
| <b>ASV_0022</b> | Schleiferia                              | Biragzang                            | microbial mat                      | 27.07             | Schleiferia thermophila TU-20 (98.8%)          | rods (0.5-0.7 / 0.5-1.5)                              | 50 (25-65)                                | heterotroph; strict aerobe; proteinolytic; capable of denitrification (nitrate to N <sub>2</sub> )                                                                             | [76]      |
| <b>ASV_0023</b> | Unclassified Alphaproteobacteria (Class) | Karmadon 4135                        | sediment                           | 7.86              | Iodidimonas spp. (<93.2%)                      | rods (0.3-1.1 / 1.2-4.4)                              | 30 (4-40)                                 | obligate heterotroph (utilizes sugars and YE); aerobe; possess aerobic respiration                                                                                             | [77]      |
| <b>ASV_0024</b> | Unclassified SR-FBR-L83 (Family)         | Karmadon 4138                        | sediment                           | 8.73              | Melioribacter roseus P3M-2 (92.4%)             | rods (0.25-0.35 / 0.65-10)                            | 55 (35-60)                                | obligate heterotroph (utilizes proteinaceous compounds, simple and complex carbohydrates); facultative anaerobe; capable of aerobic and anaerobic respiration and fermentation | [74]      |

**Supplementary Table S5. Morphological and metabolic properties of closest cultivated relatives of most abundant taxa (continued)**

| ASV      | Genus                                | Sampling site with maximum abundance | Sample type with maximal abundance | Max. abundance, % | manual NCBI/type material best BLAST hit (BBH) | Morphology (width / length in $\mu\text{m}$ ) of BBH* | T <sub>opt</sub> , °C (min - max) of BBH* | Characteristic metabolic features of BBH*                                                                                          | Reference |
|----------|--------------------------------------|--------------------------------------|------------------------------------|-------------------|------------------------------------------------|-------------------------------------------------------|-------------------------------------------|------------------------------------------------------------------------------------------------------------------------------------|-----------|
| ASV_0026 | Raineya                              | Biragzang                            | sediment                           | 8.40              | Raineya orbicola SPSPC-11 (92.8%)              | rods or filaments (0.5-0.8 / 5-15)                    | 50 (35-60)                                | obligate heterotroph (utilizes proteins, amino acids and organic acids); aerobe; possess aerobic respiration                       | [78]      |
| ASV_0027 | Unclassified Saprospiraceae (Family) | Biragzang                            | sediment                           | 8.21              | Phaeodactylibacter xiamenensis KD52 (92.4%)    | rods (0.5-0.6 / 5-10.7)                               | 28 (20-37)                                | obligate heterotroph; aerobe; possess aerobic respiration                                                                          | [79]      |
| ASV_0029 | Phaeodactylibacter                   | Karmadon 4135                        | sediment                           | 7.80              | Saprospiraceae spp. (<89.3%)                   | rods or filaments (0.5-1.4 / 2.4-21.2)                | ~20-28 (3-37)                             | obligate heterotroph; aerobe; possess aerobic respiration                                                                          | [79]      |
| ASV_0031 | Porphyrobacter                       | Biragzang                            | sediment                           | 7.18              | Porphyrobacter spp. (100%)                     | rods (0.5-1.0 / 0.5-2.8)                              | 30-37 (10-60)                             | aerobic chemoheterotroph, utilizing glucose and peptides mixtures                                                                  | [69]      |
| ASV_0032 | Blvii28 wastewater-sludge group      | Ursdon                               | sediment                           | 11.21             | Tenuifilum thalassicum 38H-str (98%)           | rods or filaments (0.11-0.17 / 3-10)                  | 50 (20-65)                                | obligate heterotroph (utilizes proteins and carbohydrates); anaerobe; capable of sulfur reduction; possess fermentative metabolism | [63]      |
| ASV_0034 | Enhydrobacter                        | Karmadon 4138                        | 0.45 $\mu\text{m}$ filter          | 6.12              | Moraxella osloensis NCTC 10465 (100%)          | rods (1-2 / 1-5) or cocci (0.6–1)                     | 33-37 (ND)                                | obligate heterotroph; aerobe; possess aerobic respiration                                                                          | [80]      |



**Supplementary Table S5. Morphological and metabolic properties of closest cultivated relatives of most abundant taxa (continued)**

| ASV      | Genus                | Sampling site with maximum abundance | Sample type with maximal abundance | Max. abundance, % | manual NCBI/type material best BLAST hit (BBH)  | Morphology (width / length in $\mu\text{m}$ ) of BBH* | T <sub>opt</sub> , °C (min - max) of BBH* | Characteristic metabolic features of BBH*                                                                                                                                                                                                                                                         | Reference |
|----------|----------------------|--------------------------------------|------------------------------------|-------------------|-------------------------------------------------|-------------------------------------------------------|-------------------------------------------|---------------------------------------------------------------------------------------------------------------------------------------------------------------------------------------------------------------------------------------------------------------------------------------------------|-----------|
| ASV_0035 | Thermodesulfitimonas | Ursdon                               | 0.22 $\mu\text{m}$ filter          | 7.66              | Thermodesulfitimonas autotrophica SF97 (96.05%) | rods (0.5-0.6 / 1-2)                                  | 65 (45-72)                                | anaerobe, sulfite reducing (with H <sub>2</sub> as an electron donor), autotroph (via transaldolase Calvin cycle variant or Wood-Ljungdahl pathway)                                                                                                                                               | [81]      |
| ASV_0037 | Micrococcus          | Karmadon 4138                        | 0.45 $\mu\text{m}$ filter          | 5.78              | Micrococcus luteus NCTC 2665 (100%)             | cocci (0.5-2)                                         | 37 (ND)                                   | obligate heterotroph; aerobe; possess aerobic respiration                                                                                                                                                                                                                                         | [82]      |
| ASV_0040 | Meiothermus          | Biragzang                            | microbial mat                      | 6.97              | Meiothermus ruber DSM 1279 (100%)               | rods (0.5-0.8 / 3-6)                                  | 60 (35-70)                                | obligate heterotroph (utilizes sugars and organic acids); aerobe; possess aerobic respiration                                                                                                                                                                                                     | [83]      |
| ASV_0041 | Sulfurospirillum     | Ursdon                               | sediment                           | 9.55              | Sulfurospirillum deleyianum DSM 6946 (100%)     | vibrios or spirills (0.3-0.5 / 1-3)                   | ND (20-42)                                | facultative autotroph; anaerobe/microaerobe; possess aerobic respiration with organic acids as the electron donor or anaerobic respiration with hydrogen or formate as the electron donor and nitrate, nitrite, sulfite, thiosulfate, elemental sulfur, DMSO or fumarate as the electron acceptor | [84]      |

**Supplementary Table S5. Morphological and metabolic properties of closest cultivated relatives of most abundant taxa (continued)**

| ASV             | Genus                                          | Sampling site with maximum abundance | Sample type with maximal abundance | Max. abundance, % | manual NCBI/type material best BLAST hit (BBH)     | Morphology (width / length in $\mu\text{m}$ ) of BBH* | T <sub>opt</sub> , °C (min - max) of BBH* | Characteristic metabolic features of BBH*                                                                                                                                                          | Reference            |
|-----------------|------------------------------------------------|--------------------------------------|------------------------------------|-------------------|----------------------------------------------------|-------------------------------------------------------|-------------------------------------------|----------------------------------------------------------------------------------------------------------------------------------------------------------------------------------------------------|----------------------|
| <b>ASV_0043</b> | Unclassified<br>Thermodesulfobionia<br>(Class) | Biragzang                            | 0.22 $\mu\text{m}$<br>filter       | 5.84              | Dissulfurispira<br>thermophila T55J<br>(98.4%)     | rods or spirals<br>(0.32-0.49 / 0.5-<br>19)           | 53-57 (25-<br>60)                         | obligate autotroph;<br>anaerobe; possess<br>disproportionation of<br>thiosulfate and<br>elemental<br>sulfur,                                                                                       | <a href="#">[85]</a> |
| <b>ASV_0044</b> | Dissulfurimicrobium                            | Ursdon                               | 0.45 $\mu\text{m}$<br>filter       | 5.27              | Dissulfurirhabdus<br>thermomarina SH388<br>(94.4%) | rods (0.2-0.4 /<br>1-2.5)                             | 50 (25-58)                                | anaerobe, sulfite<br>reducing (with H <sub>2</sub> as an<br>electron donor),<br>autotroph. Able to grow<br>by disproportionation of<br>sulfite and elemental<br>sulfur into sulfide and<br>sulfate | <a href="#">[86]</a> |
| <b>ASV_0047</b> | Candidatus<br>Nitrososphaera                   | Karmadon<br>4135                     | sediment                           | 6.22              | Nitrososphaera<br>viennensis EN76<br>(98.4%)       | cocci (0.65-<br>0.91)                                 | 42 (28-47)                                | mixotroph; aerobe;<br>oxidizes ammonia to<br>nitrite with oxygen as<br>the electron acceptor                                                                                                       | <a href="#">[87]</a> |
| <b>ASV_0048</b> | Unclassified<br>Spirochaetaceae<br>(Family)    | Ursdon                               | 0.22 $\mu\text{m}$<br>filter       | 5.00              | Rectinema cohabitans<br>HM (100%)                  | rods (0.3-0.5 /<br>1-2.5)                             | 37 (12-50)                                | obligate heterotroph;<br>anaerobe; ferments<br>various sugars                                                                                                                                      | <a href="#">[88]</a> |
| <b>ASV_0068</b> | Treponema                                      | Ursdon                               | sediment                           | 5.28              | Treponema caldarium<br>DSM 7334 (100%)             | helicals (0.2-0.3<br>/ 15-45)                         | 48-52 (25-<br>60)                         | obligate heterotroph;<br>anaerobe; ferments<br>carbohydrates                                                                                                                                       | <a href="#">[89]</a> |

**Supplementary Table S6.** Results of BLAST search of the most abundant deep uncultured lineages detected in North Ossetian thermal habitats.

| ASV number      | Silva138 predicted taxonomy         | NCBI accession of BLAST hit | Isolation source                          | Geolocation                                      | Identity, % |
|-----------------|-------------------------------------|-----------------------------|-------------------------------------------|--------------------------------------------------|-------------|
| <b>ASV_0084</b> | Unclassified<br>TSAC18 (Class)      | KP930849.1                  | post-volcanic pyroclastic surface         | Kasatochi Island, Alaska, USA                    | 96.81       |
|                 |                                     | FJ936877.1                  | volcano mud                               | Avachinsky volcano, Kamtchatka, Russia           | 96.02       |
|                 |                                     | DQ088766.1                  | Fracture-derived groundwater              | South Africa                                     | 94.02       |
|                 |                                     | EF562164.1                  | Henderson Molybdenum Mine                 | USA: Colorado, Empire                            | 93.63       |
|                 |                                     | MH387930.1                  | Thermogenic travertine                    | Greece                                           | 92.46       |
| <b>ASV0001</b>  | Unclassified<br>Firmicutes (Phylum) | KP930849.1                  | soil or post-volcanic pyroclastic surface | Kasatochi Island, Alaska, US                     | 96.02       |
|                 |                                     | FJ936877.1                  | volcano mud                               | Avachinsky, Kamtchatka, Russia                   | 93.23       |
|                 |                                     | EF562164.1                  | Henderson Molybdenum Mine                 | USA: Colorado, Empire                            | 92.06       |
|                 |                                     | DQ088766.1                  | Fracture-derived groundwater              | South Africa                                     | 91.63       |
|                 |                                     | MN157828.1                  | anaerobic digester                        | n/d                                              | 91.16       |
| <b>ASV_0024</b> | Unclassified<br>SR-FBR-L83 (Family) | KM700928.1                  | hot spring                                | Yellowstone National Park, US                    | 99.20       |
|                 |                                     | AF027013.1                  | Obsidian Pool sediment                    | Yellowstone National Park, US                    | 97.61       |
|                 |                                     | MF612776.1                  | acidogenic reactor                        | n/d                                              | 97.21       |
|                 |                                     | MF894809.1                  | coal seam environment                     | Australia                                        | 97.55       |
|                 |                                     | MN156931.1                  | anaerobic digester                        | n/d                                              | 96.02       |
| <b>ASV_0051</b> | Unclassified<br>Parcubacteria       | LC070984.1                  | deep sea mud                              | Japan, Sagami bay                                | 92.71       |
|                 |                                     | AB825243.1                  | sediment                                  | Japan:Okinawa, Okinawa Trough, Iheya North Knoll | 92.28       |
|                 |                                     | AB177199.1                  | hydrate bearing subseafloor sediment      | Peru                                             | 92.31       |
|                 |                                     | AB827012.1                  | hadopelagic sediment                      | Japan, Ogasawara Trench                          | 91.50       |
|                 |                                     | HF545524.1                  | deep sediment                             | Mexico:Sonora Margin, Guaymas Basin              | 91.53       |
| <b>ASV_0054</b> | Candidatus<br>Omnitrophus           | KY517874.1                  | lake water                                | Canada: Experimental Lakes Area, Ontario         | 94.02       |
|                 |                                     | KF886090.1                  | hydrothermal carbonate chimney            | New Caledonia: Prony Bay                         | 92.43       |
|                 |                                     | AB924396.1                  | deep groundwater                          | Japan:Shizuoka, Yaizu                            | 90.44       |
|                 |                                     | KC604650.1                  | groundwater                               | Mahomet aquifer of east-central Illinois, US     | 89.72       |
|                 |                                     | KU090195.1                  | oil field                                 | n/d                                              | 89.24       |

**Supplementary Table S7.** Sequence and design scheme of primers, used for 16S community profiling.

### 16S GENE PRIMERS

| Primer name | Target region | Illumina partial adapter sequence  | Pad and heterogeneity spacer | 16S rRNA gene annealing sequence | Full sequence 5' - 3'                                        |
|-------------|---------------|------------------------------------|------------------------------|----------------------------------|--------------------------------------------------------------|
| V4_515F     | V4            | TCGTCGGCAGCGTCAGATGTGTATAAGAGACAG  | NN                           | GTGBCAGCMGCCGCGGTAA              | TCGTCGGCAGCGTCAGATGTGTATAAGAGACAGNNGTGBCAGCMGCCGCGGTAA       |
| V4_515F     | V4            | TCGTCGGCAGCGTCAGATGTGTATAAGAGACAG  | NNN                          | GTGBCAGCMGCCGCGGTAA              | TCGTCGGCAGCGTCAGATGTGTATAAGAGACAGNNNGTGBCAGCMGCCGCGGTAA      |
| V4_515F     | V4            | TCGTCGGCAGCGTCAGATGTGTATAAGAGACAG  | NNNN                         | GTGBCAGCMGCCGCGGTAA              | TCGTCGGCAGCGTCAGATGTGTATAAGAGACAGNNNNGTGBCAGCMGCCGCGGTAA     |
| V4_515F     | V4            | TCGTCGGCAGCGTCAGATGTGTATAAGAGACAG  | NNNNN                        | GTGBCAGCMGCCGCGGTAA              | TCGTCGGCAGCGTCAGATGTGTATAAGAGACAGNNNNNGTGBCAGCMGCCGCGGTAA    |
| V4_806R     | V4            | GTCTCGTGGGCTCGGAGATGTGTATAAGAGACAG | NN                           | GACTACNVGGGTMTCTAATCC            | GTCTCGTGGGCTCGGAGATGTGTATAAGAGACAGNNGACTACNVGGGTMTCTAATCC    |
| V4_806R     | V4            | GTCTCGTGGGCTCGGAGATGTGTATAAGAGACAG | NNN                          | GACTACNVGGGTMTCTAATCC            | GTCTCGTGGGCTCGGAGATGTGTATAAGAGACAGNNNGACTACNVGGGTMTCTAATCC   |
| V4_806R     | V4            | GTCTCGTGGGCTCGGAGATGTGTATAAGAGACAG | NNNN                         | GACTACNVGGGTMTCTAATCC            | GTCTCGTGGGCTCGGAGATGTGTATAAGAGACAGNNNNGACTACNVGGGTMTCTAATCC  |
| V4_806R     | V4            | GTCTCGTGGGCTCGGAGATGTGTATAAGAGACAG | NNNNN                        | GACTACNVGGGTMTCTAATCC            | GTCTCGTGGGCTCGGAGATGTGTATAAGAGACAGNNNNNGACTACNVGGGTMTCTAATCC |

### ILLUMINA P5 INDEXING PRIMERS

| Primer name | index 2 read in sample sheet | Illumina P5 adapter           | i5 index (index 2) | Illumina adapter sequence | Full sequence 5' - 3'                             |
|-------------|------------------------------|-------------------------------|--------------------|---------------------------|---------------------------------------------------|
| R1TM25      | ACTGAT                       | AATGATACGGCGACCACCGAGATCTACAC | ACTGAT             | TCGTCGGCAGCGTC            | AATGATACGGCGACCACCGAGATCTACACACTGATTCGTCGGCAGCGTC |
| R1TM26      | ATGAGC                       | AATGATACGGCGACCACCGAGATCTACAC | ATGAGC             | TCGTCGGCAGCGTC            | AATGATACGGCGACCACCGAGATCTACACATGAGCTCGTCGGCAGCGTC |
| R1TM27      | ATTCCT                       | AATGATACGGCGACCACCGAGATCTACAC | ATTCCT             | TCGTCGGCAGCGTC            | AATGATACGGCGACCACCGAGATCTACACATTCCTTCGTCGGCAGCGTC |
| R1TM28      | CAAAAG                       | AATGATACGGCGACCACCGAGATCTACAC | CAAAAG             | TCGTCGGCAGCGTC            | AATGATACGGCGACCACCGAGATCTACACCAAAAGTCGTCGGCAGCGTC |
| R1TM29      | CAACTA                       | AATGATACGGCGACCACCGAGATCTACAC | CAACTA             | TCGTCGGCAGCGTC            | AATGATACGGCGACCACCGAGATCTACACCAACTATCGTCGGCAGCGTC |
| R1TM30      | CACCGG                       | AATGATACGGCGACCACCGAGATCTACAC | CACCGG             | TCGTCGGCAGCGTC            | AATGATACGGCGACCACCGAGATCTACACCACCGGTCGTCGGCAGCGTC |
| R1TM31      | CACGAT                       | AATGATACGGCGACCACCGAGATCTACAC | CACGAT             | TCGTCGGCAGCGTC            | AATGATACGGCGACCACCGAGATCTACACCACGATTCGTCGGCAGCGTC |
| R1TM32      | CACTCA                       | AATGATACGGCGACCACCGAGATCTACAC | CACTCA             | TCGTCGGCAGCGTC            | AATGATACGGCGACCACCGAGATCTACACCACTCATCGTCGGCAGCGTC |

Supplementary Table S7. Sequence and design scheme of primers, used for 16S community profiling. (continued)

| ILLUMINA P7 INDEXING PRIMERS |                              |                          |                    |                           |                                               |
|------------------------------|------------------------------|--------------------------|--------------------|---------------------------|-----------------------------------------------|
| Primer name                  | index 1 read in sample sheet | Illumina P7 adapter      | i7 index (index 1) | Illumina adapter sequence | Full sequence 5' - 3'                         |
| R2TM51                       | TGAAGG                       | CAAGCAGAAGACGGCATACGAGAT | CCTTCA             | GTCTCGTGGGCTCGG           | CAAGCAGAAGACGGCATACGAGATCCTTCAGTCTCGTGGGCTCGG |
| R2TM52                       | AACATA                       | CAAGCAGAAGACGGCATACGAGAT | TATGTT             | GTCTCGTGGGCTCGG           | CAAGCAGAAGACGGCATACGAGATTATGTTGTCTCGTGGGCTCGG |
| R2TM53                       | CGCGTC                       | CAAGCAGAAGACGGCATACGAGAT | GACGCG             | GTCTCGTGGGCTCGG           | CAAGCAGAAGACGGCATACGAGATGACGCGGTCTCGTGGGCTCGG |
| R2TM54                       | GATACA                       | CAAGCAGAAGACGGCATACGAGAT | TGTATC             | GTCTCGTGGGCTCGG           | CAAGCAGAAGACGGCATACGAGATTGTATCGTCTCGTGGGCTCGG |
| R2TM55                       | GGTGTG                       | CAAGCAGAAGACGGCATACGAGAT | CACACC             | GTCTCGTGGGCTCGG           | CAAGCAGAAGACGGCATACGAGATCACACCGTCTCGTGGGCTCGG |
| R2TM56                       | TAAGAA                       | CAAGCAGAAGACGGCATACGAGAT | TTCTTA             | GTCTCGTGGGCTCGG           | CAAGCAGAAGACGGCATACGAGATTTCTTAGTCTCGTGGGCTCGG |
| R2TM57                       | AGCGAG                       | CAAGCAGAAGACGGCATACGAGAT | CTCGCT             | GTCTCGTGGGCTCGG           | CAAGCAGAAGACGGCATACGAGATCTCGCTGTCTCGTGGGCTCGG |
| R2TM58                       | CGGTTA                       | CAAGCAGAAGACGGCATACGAGAT | TAACCG             | GTCTCGTGGGCTCGG           | CAAGCAGAAGACGGCATACGAGATTAACCGGTCTCGTGGGCTCGG |

## SUPPLEMENTARY FIGURES

Supplementary Figure S1. PCA ordination of sampling sites according to environmental parameters.

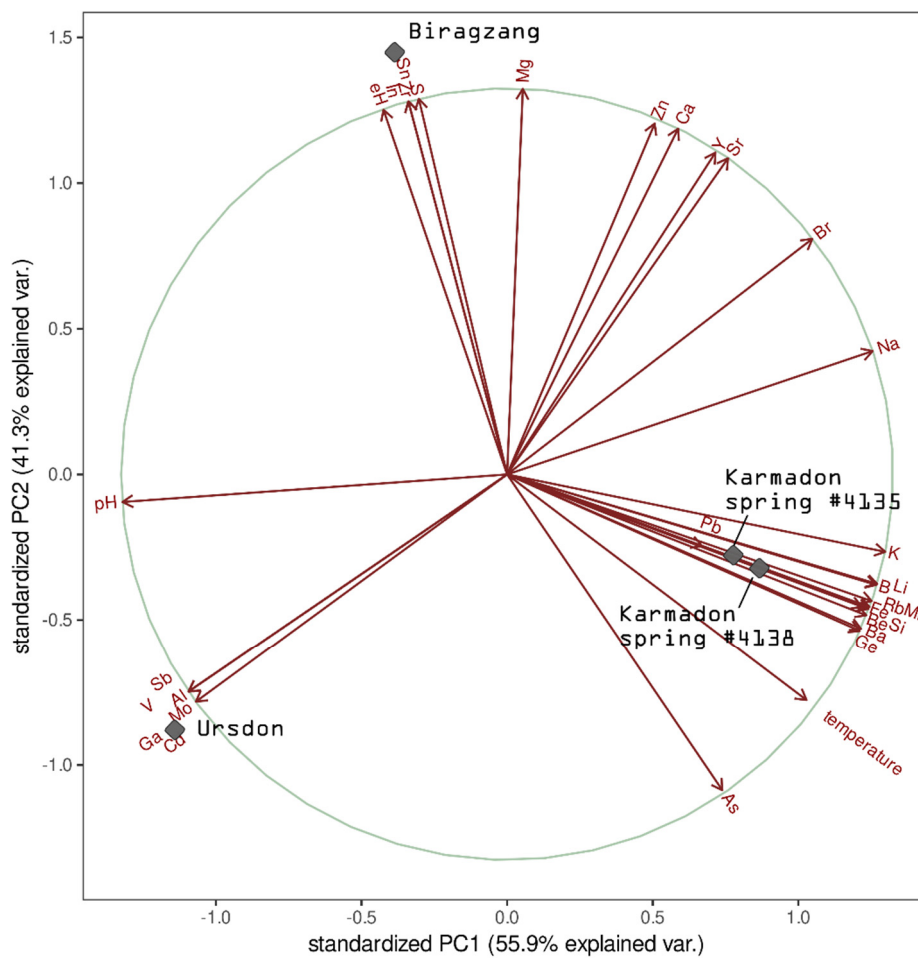

Supplementary Figure S2. NMDS analysis of repeatability of PCR replicates

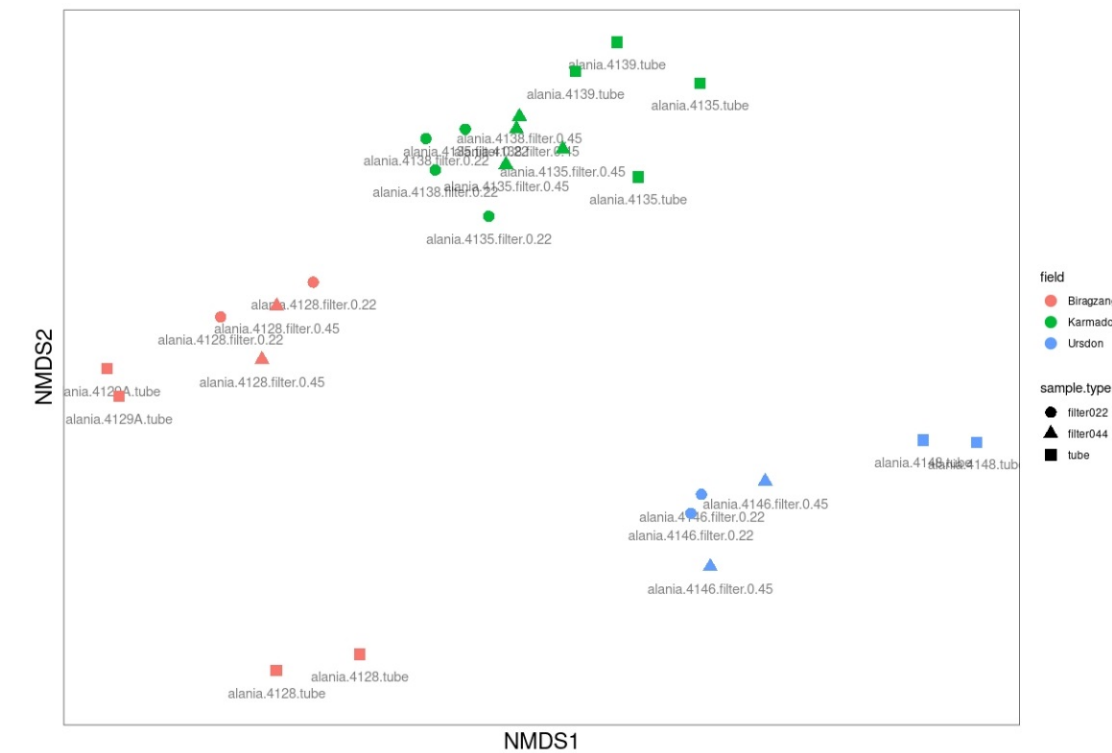

Supplementary Figure S3. Rarefaction curves of North-Ossetian thermophilic microbial communities.

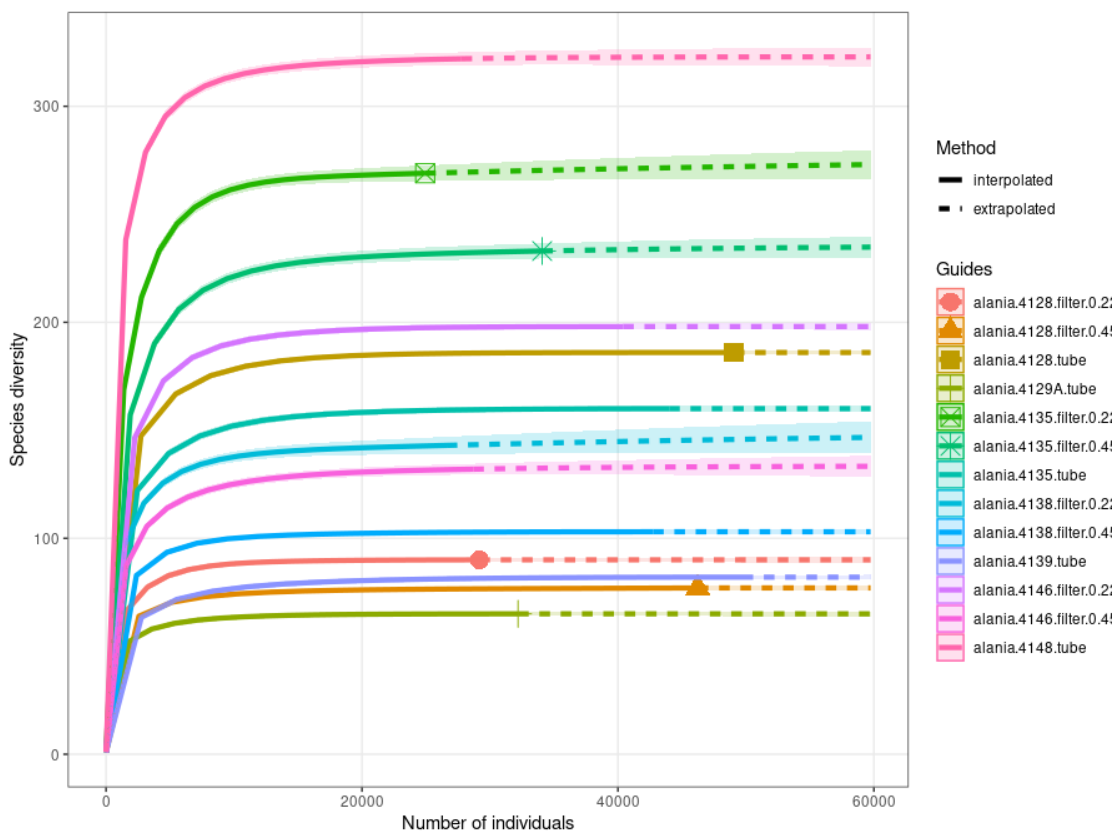

Supplementary Figure S4. Bubble plot of taxonomic composition of sampled microbial communities (by order)

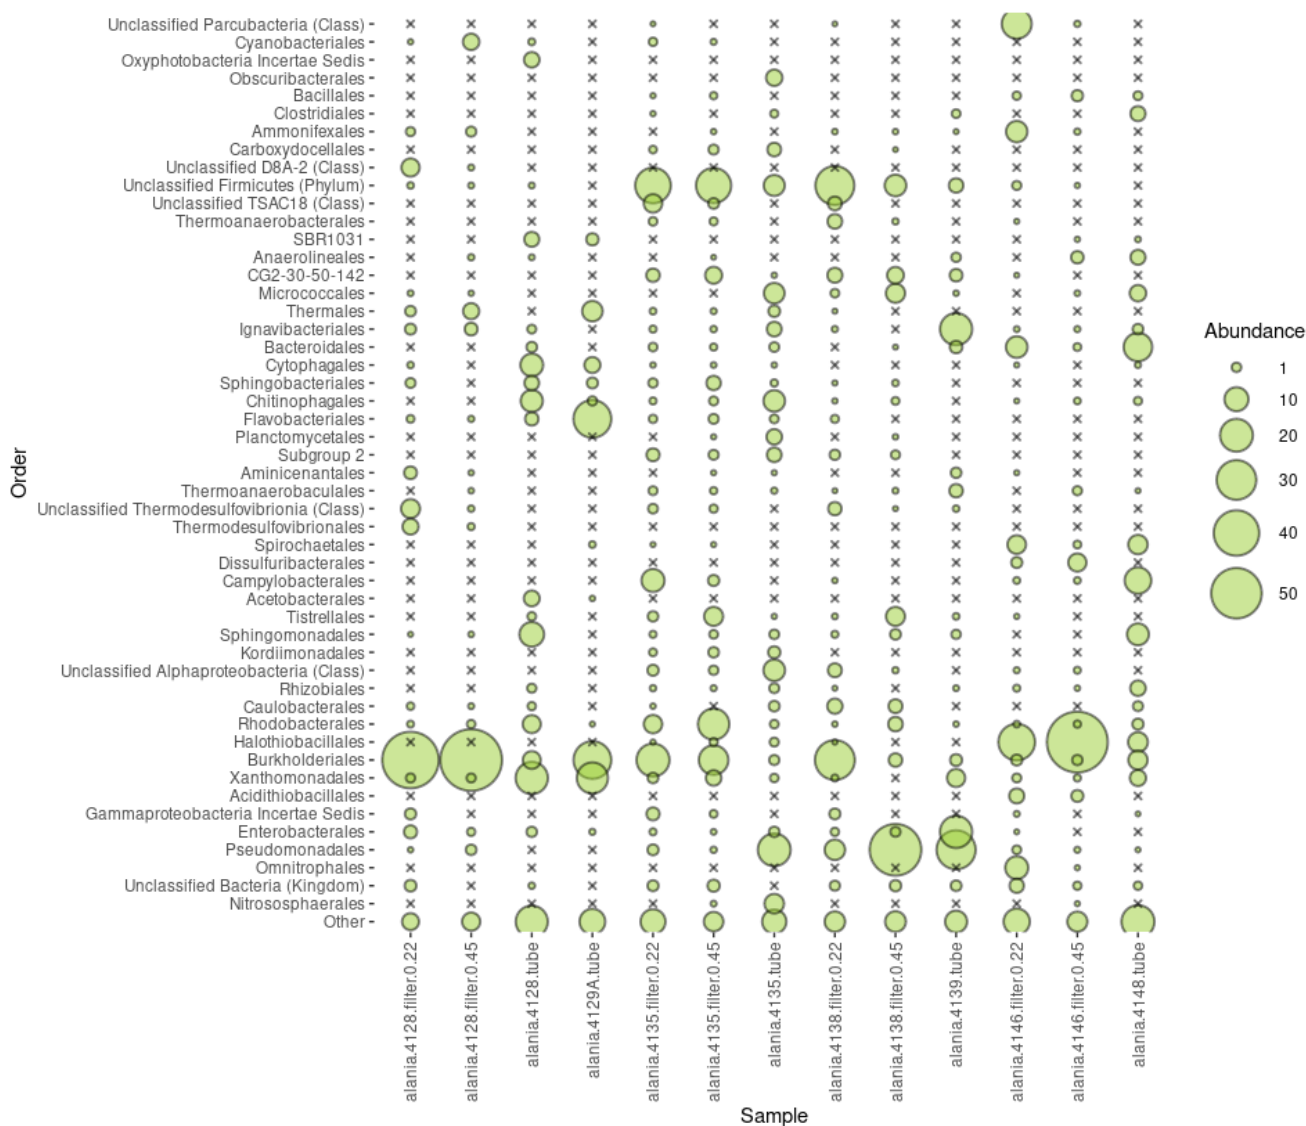

Supplement: s1 [file s1]
